# Supplementary material for: Thinning Promotes Soil Phosphorus Bioavailability in Short-Rotation and High-Density Eucalyptus grandis × E. urophylla Coppice Plantation in Guangxi, Southern China
Source: MDPI journal article supplement (doi:10.3390/f14102067), 2023-10-16
Supplement: s1 [file s1]

## Supplementary Materials

**Table S1.** Pearson correlation matrix of soil nutrient, microbial biomass and enzyme activity in *E. grandis* × *E. urophylla* sprout forests.

|      | DOC            | TN             | AN             | TP             | AP             | MBC   | qMBC            | MBN            | qMBN           | MBP             | qMBP           | BG              | URE            | ACP           |
|------|----------------|----------------|----------------|----------------|----------------|-------|-----------------|----------------|----------------|-----------------|----------------|-----------------|----------------|---------------|
| SOC  | <b>0.82***</b> | <b>0.96***</b> | <b>0.85***</b> | <b>0.75***</b> | <b>0.69***</b> | 0.31  | <b>-0.64***</b> | <b>0.54**</b>  | -0.23          | <b>0.74***</b>  | 0.30           | <b>0.53**</b>   | <b>0.66***</b> | 0.11          |
| DOC  |                | <b>0.77***</b> | <b>0.62***</b> | <b>0.61***</b> | <b>0.68***</b> | 0.28  | <b>-0.53**</b>  | <b>0.50**</b>  | -0.12          | <b>0.73***</b>  | <b>0.41*</b>   | <b>0.49**</b>   | <b>0.69***</b> | 0.07          |
| TN   |                |                | <b>0.88***</b> | <b>0.85***</b> | <b>0.64***</b> | 0.30  | <b>-0.58***</b> | <b>0.58***</b> | -0.23          | <b>0.72***</b>  | 0.14           | <b>0.51**</b>   | <b>0.66***</b> | 0.17          |
| AN   |                |                |                | <b>0.77***</b> | <b>0.64***</b> | 0.25  | <b>-0.57**</b>  | <b>0.48**</b>  | -0.22          | <b>0.66***</b>  | 0.16           | <b>0.51**</b>   | <b>0.57**</b>  | 0.18          |
| TP   |                |                |                |                | <b>0.59***</b> | 0.18  | <b>-0.46*</b>   | <b>0.51**</b>  | -0.19          | <b>0.78***</b>  | 0.05           | <b>0.41*</b>    | 0.31           | 0.12          |
| AP   |                |                |                |                |                | -0.24 | <b>-0.80***</b> | 0.17           | <b>-0.38*</b>  | <b>0.70***</b>  | <b>0.45*</b>   | <b>0.65***</b>  | 0.25           | 0.07          |
| MBC  |                |                |                |                |                |       | <b>0.47**</b>   | <b>0.65***</b> | <b>0.45*</b>   | 0.08            | -0.16          | -0.23           | <b>0.48**</b>  | 0.11          |
| qMBC |                |                |                |                |                |       |                 | 0.06           | <b>0.46*</b>   | <b>-0.62***</b> | <b>-0.53**</b> | <b>-0.61***</b> | -0.25          | 0.02          |
| MBN  |                |                |                |                |                |       |                 |                | <b>0.64***</b> | <b>0.45*</b>    | 0.08           | 0.10            | <b>0.60***</b> | 0.17          |
| qMBN |                |                |                |                |                |       |                 |                |                | -0.16           | 0.01           | -0.28           | 0.13           | 0.11          |
| MBP  |                |                |                |                |                |       |                 |                |                |                 | <b>0.64***</b> | <b>0.56**</b>   | <b>0.38*</b>   | 0.06          |
| qMBP |                |                |                |                |                |       |                 |                |                |                 |                | 0.34            | 0.20           | -0.17         |
| BG   |                |                |                |                |                |       |                 |                |                |                 |                |                 | 0.35           | <b>0.56**</b> |
| URE  |                |                |                |                |                |       |                 |                |                |                 |                |                 |                | 0.24          |

Note: Bold be used for highlighting correlationship that over significant level ( $P < 0.05$ ). \*:  $P < 0.05$ , \*\*:  $P < 0.01$ , \*\*\*:  $P < 0.001$ .
